# Supplementary material for: Extracellular signal-regulated kinase 8-mediated NF-κB activation increases sensitivity of human lung cancer cells to arsenic trioxide
Source: PubMed Central journal article supplement (PMC5564756; doi:10.18632/oncotarget.17100), 2017-04-13
Supplement: oncotarget-08-49144-s001.pdf [file oncotarget-08-49144-s001.pdf]

## Extracellular signal-regulated kinase 8-mediated NF- $\kappa$ B activation increases sensitivity of human lung cancer cells to arsenic trioxide

### Supplementary Materials

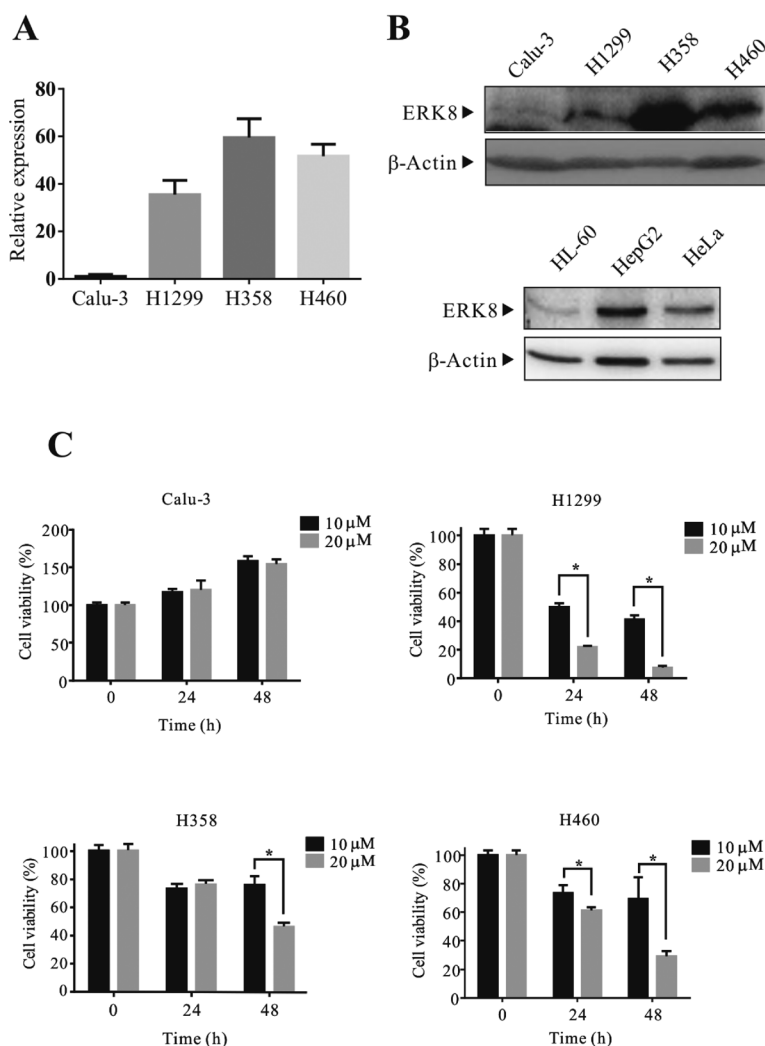

**Supplementary Figure 1: Relationship of ERK8 expression levels in human lung cancer cell lines and their degree of sensitivities to the anti-cancer drug  $As_2O_3$ .** (A) Quantitative real-time PCR for the determination of the mRNA level of ERK8 in four human lung cancer cell lines. It is a representative of three experiments. The signals were quantified and normalized with those of  $\beta$ -actin and plotted as a relative ratio, setting 1 for Calu-3. Results are expressed as mean  $\pm$  SD of triplicate samples and reproducibility was confirmed in three separate experiments. (B) The corresponding western blot of (A) for the detection of the protein level of ERK8, including also cell lines from other tissues. Whole cell lysate were extracted by  $1\times$  sample buffer, antibodies against ERK8 and  $\beta$ -actin were used to measure the level of ERK8 and loading difference. (C) After 24 or 48 h of  $As_2O_3$  treatment, the percentage of cell viability in these human lung cancer cells was determined by MTS assay. \*A significant difference of  $P < 0.05$ . The data are representative of three independent experiments.

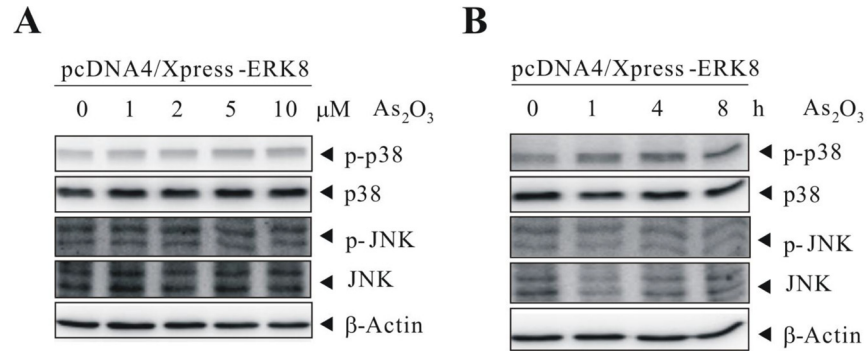

**Supplementary Figure 2: The effect of As<sub>2</sub>O<sub>3</sub> on JNK and p38 MAPK pathways in the presence of ERK8.** HEK293T cells were transfected with pcDNA4/Xpress-ERK8 expression plasmid (6 μg). At 24 h post-transfection, they were cultured in serum-free medium for 24 h, after which they were sham exposed or exposed to As<sub>2</sub>O<sub>3</sub> and monitored. (A) 1 to 10 μM As<sub>2</sub>O<sub>3</sub> for 4 h; (B) 5 μM As<sub>2</sub>O<sub>3</sub> for 1 to 8 h. Cells were lysed, and protein extracts were subjected to SDS-PAGE followed by immunoblotting using antibodies against p-JNK, p-p38 MAPK, JNK, p38 MAPK, and β-actin to monitor the phosphorylation and total level of JNK, p38 MAPK, and loading difference, respectively. The data are representative of three independent experiments.
